# Supplementary material for: Bulky and Stable Copper(I)-Phenanthroline Complex: Impact of Steric Strain and Symmetry on the Excited-State Properties
Source: PubMed Central journal article supplement — Inorg Chem. 2022 May 4;61(19):7296–307. doi: 10.1021/acs.inorgchem.1c03901 (PMC9116384; doi:10.1021/acs.inorgchem.1c03901), 2022-05-04
Supplement: ic1c03901_si_001.pdf [file ic1c03901_si_001.pdf]

**A bulky and stable copper(I)-phenanthroline complex: impact of steric strain and symmetry on the excited-state properties.**

Lea Gimeno,<sup>1</sup> Brian T. Phelan,<sup>2</sup> Emily A. Sprague-Klein,<sup>2</sup> Thierry Roisnel,<sup>3</sup> Errol Blart,<sup>1</sup> Christophe Gourlaouen,<sup>4\*</sup> Lin X. Chen,<sup>2,5\*</sup> Yann Pellegrin<sup>1\*</sup>

<sup>1</sup>Université de Nantes, CNRS, CEISAM UMR6230, F-44000 Nantes, France

<sup>2</sup>Chemical Science and Engineering Division, Argonne National Laboratory, Lemont, Illinois 60439, United States

<sup>3</sup>Université de Rennes CNRS, Institut des Sciences Chimiques de Rennes, UMR6226, F-35000 Rennes, France

<sup>4</sup>Laboratoire de Chimie Quantique Institut de Chimie UMR 7177 CNRS-Université de Strasbourg, 4, Rue Blaise Pascal CS 90032, F-67081 Strasbourg Cedex, France

<sup>5</sup>Department of Chemistry, Northwestern University, Evanston Illinois 60208, United States

Corresponding authors Email addresses:

[gourlaouen@unistra.fr](mailto:gourlaouen@unistra.fr)

[lchen@anl.gov](mailto:lchen@anl.gov)

[Yann.pellegrin@univ-nantes.fr](mailto:Yann.pellegrin@univ-nantes.fr)

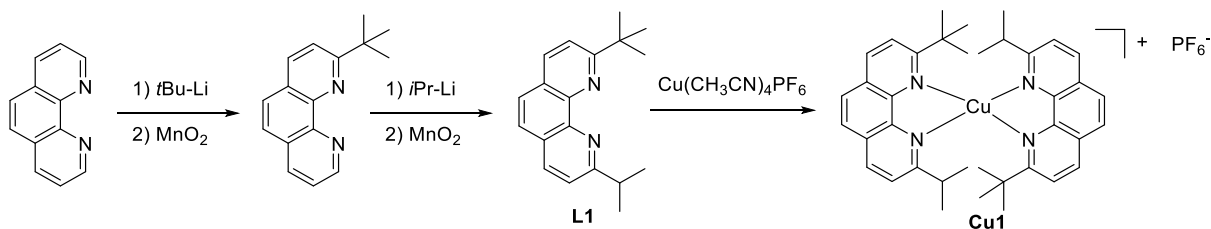

**Figure S1.** Synthesis of ligand L1 and complex Cu1.

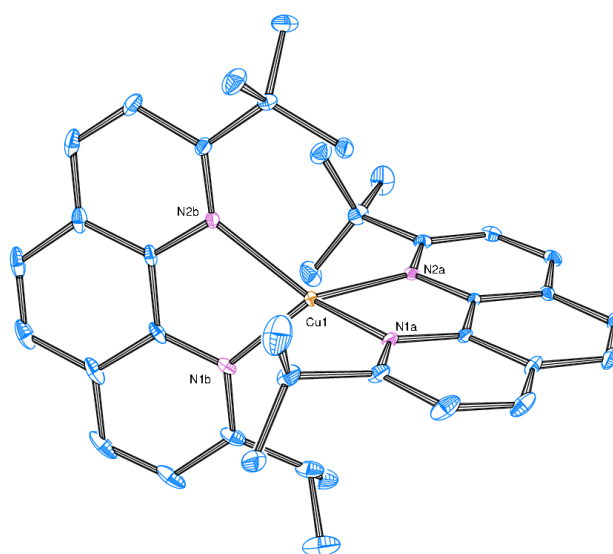

**Figure S2.** ORTEP view of complex **Cu1**. Ellipsoids are drawn at 50% probability level. Counter-anion omitted for clarity

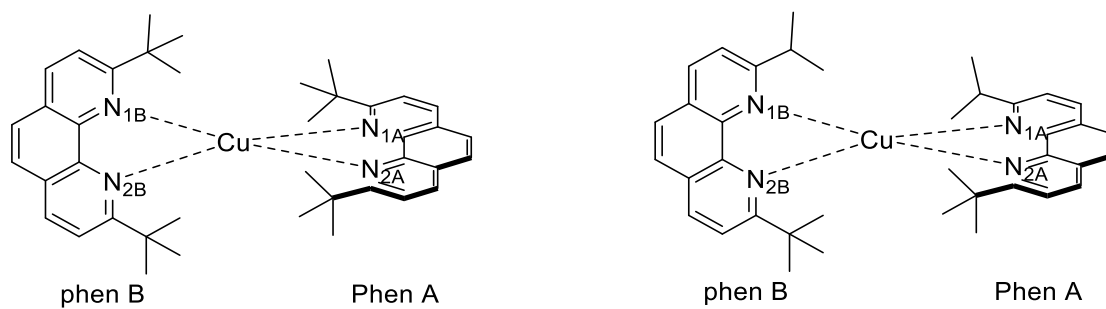

**Figure S3.** Used nomenclature to name nitrogen atoms with regards to the position of isopropyl or *tert*-butyl bulky groups.

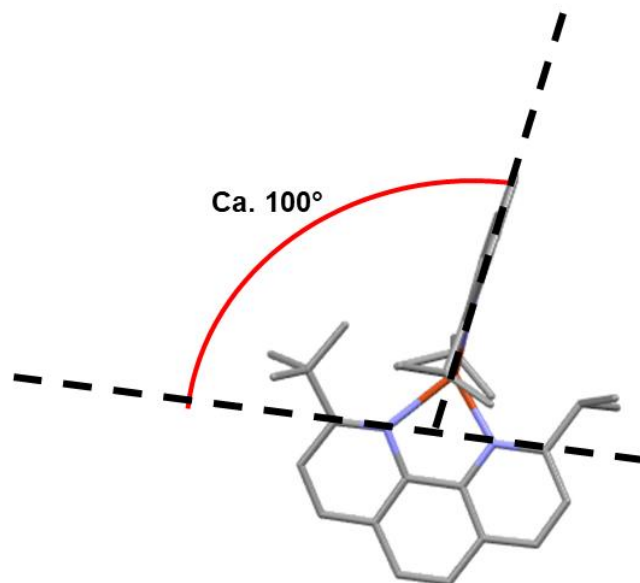

**Figure S4.** Illustration of the steric repulsion induced by *tert*-butyl vs. isopropyl substituents.

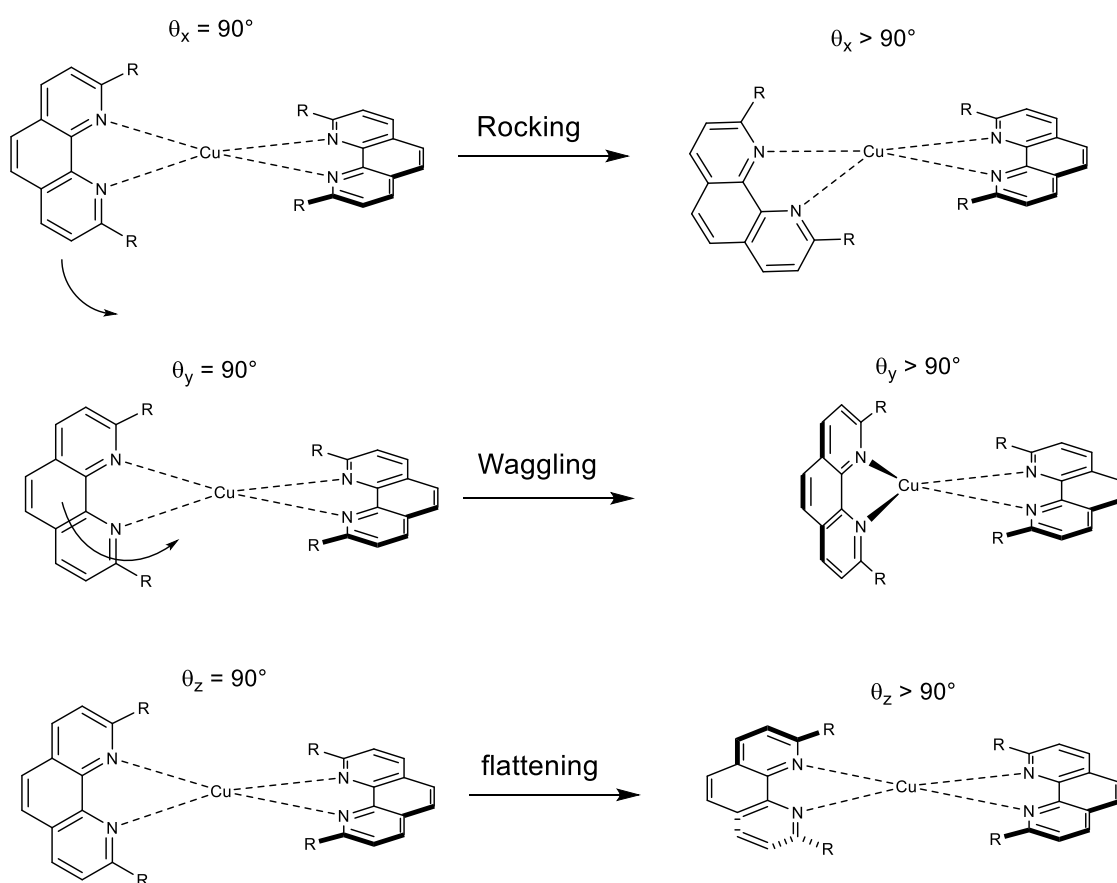

**Figure S5.** Illustration of the various distortion motions in homoleptic copper(I) complexes, related to  $\theta_x$ ,  $\theta_y$  and  $\theta_z$  angles.

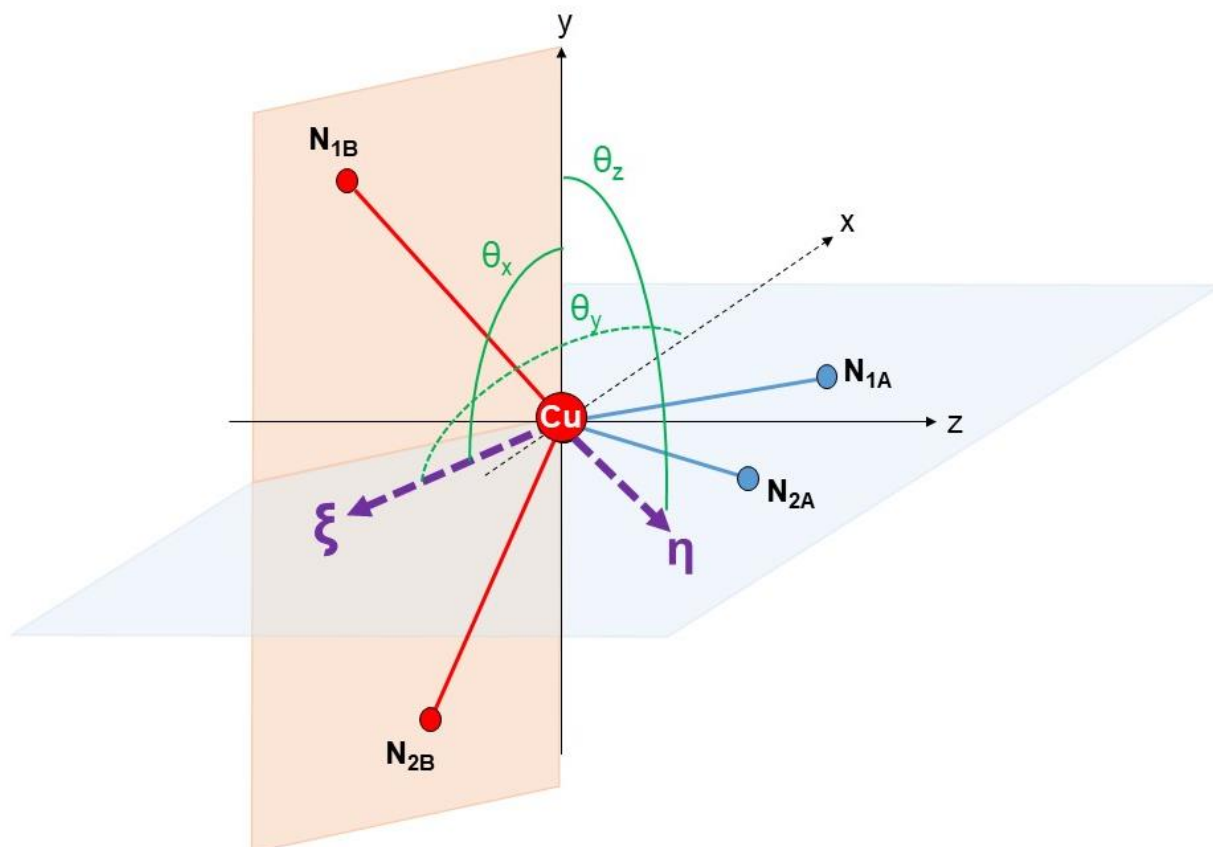

**Figure S6.** Illustration of the  $\theta_{x,y,z}$  angles and the parameters necessary to define and measure them. Phenanthroline A is in the (x,z) plane, unit vector  $\xi$  is bisecting angle  $N_{1B}$ -Cu- $N_{2B}$ , unit vector  $\eta$  is orthogonal to the plane defined by Cu,  $N_{1B}$  and  $N_{2B}$ ,  $\theta_x$  is the angle between  $\xi$  and y,  $\theta_y$  is the angle between  $\xi$  and x and  $\theta_z$  is the angle between y and  $\eta$ .  $\theta_{x,y,z}$  angles have been calculated according to the protocol described in the literature.<sup>1</sup>

| Complex                                                                                                                                                                                                                                                                                                                       | structure                                                                            |
|-------------------------------------------------------------------------------------------------------------------------------------------------------------------------------------------------------------------------------------------------------------------------------------------------------------------------------|--------------------------------------------------------------------------------------|
| <p data-bbox="379 293 568 322">[Cu(dipp)<sub>2</sub>]<sup>+</sup> [2]</p> <p data-bbox="379 394 501 423"><math>\theta_x = 82.2</math></p> <p data-bbox="379 427 501 456"><math>\theta_y = 72.5</math></p> <p data-bbox="379 461 501 490"><math>\theta_z = 85.4</math></p>                                                     | 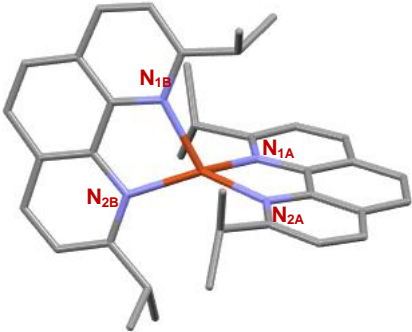   |
| <p data-bbox="379 674 437 703"><b>Cu1</b></p> <p data-bbox="379 775 501 804"><math>\theta_x = 87.2</math></p> <p data-bbox="379 808 501 837"><math>\theta_y = 87.4</math></p> <p data-bbox="379 842 501 871"><math>\theta_z = 87.3</math></p>                                                                                 |   |
| <p data-bbox="379 1099 544 1167">[Cu(dtbp)<sub>2</sub>]<sup>+</sup>,<br/>(BF<sub>4</sub><sup>-</sup>)<sup>[3]</sup></p> <p data-bbox="379 1238 501 1267"><math>\theta_x = 88.6</math></p> <p data-bbox="379 1272 501 1301"><math>\theta_y = 90.0</math></p> <p data-bbox="379 1305 501 1335"><math>\theta_z = 91.8</math></p> |  |

**Figure S7.** Structures and spatial disposition for the calculations of  $\theta_{x,y,z}$  angles. Hydrogen atoms, solvent molecules and counter anions have been omitted for clarity.

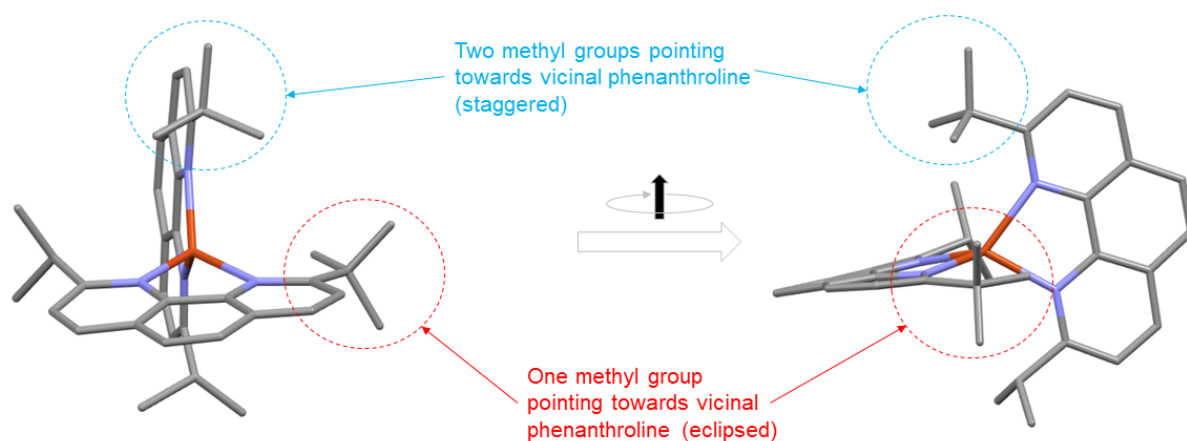

**Figure S8.** Illustration of the two different conformations of the *t*Bu groups in the structure of **Cu1** (the structures of the left and on the right are two different views of the same structure obtained by rotation along a vertical axis).

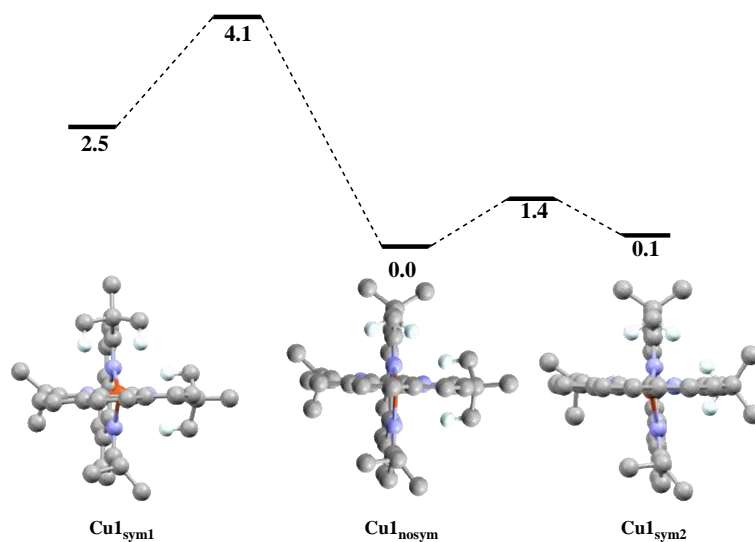

**Figure S9.** Reaction pathway for *tert*-Butyl rotation, energies are in kcal/mol.

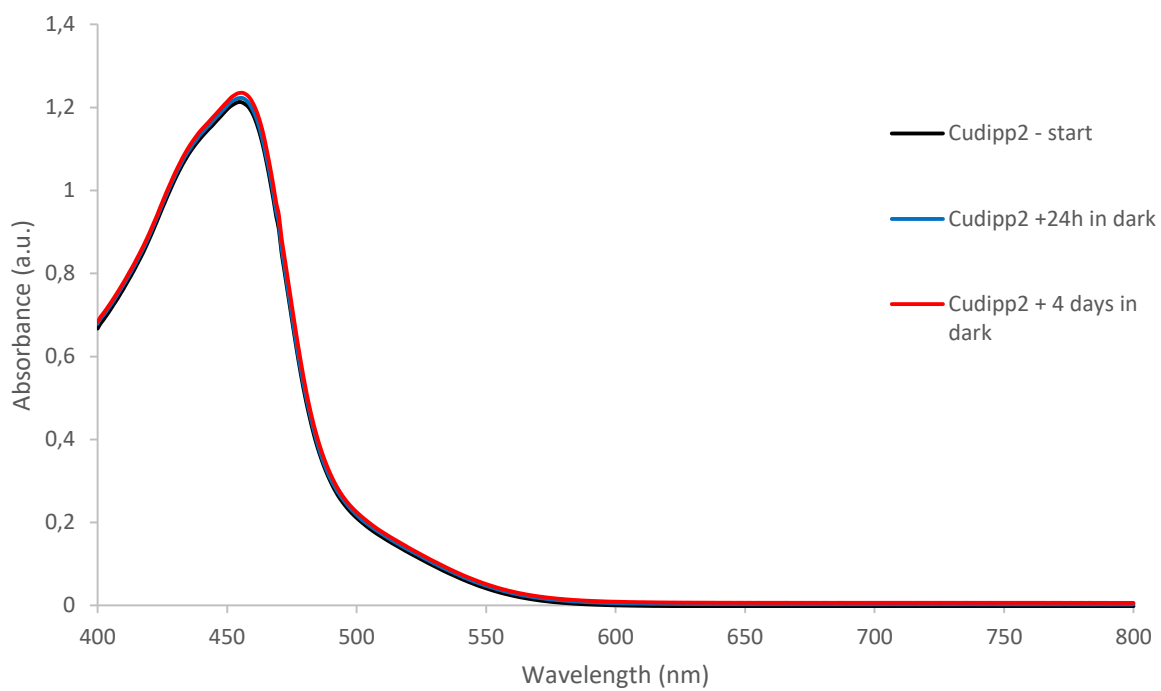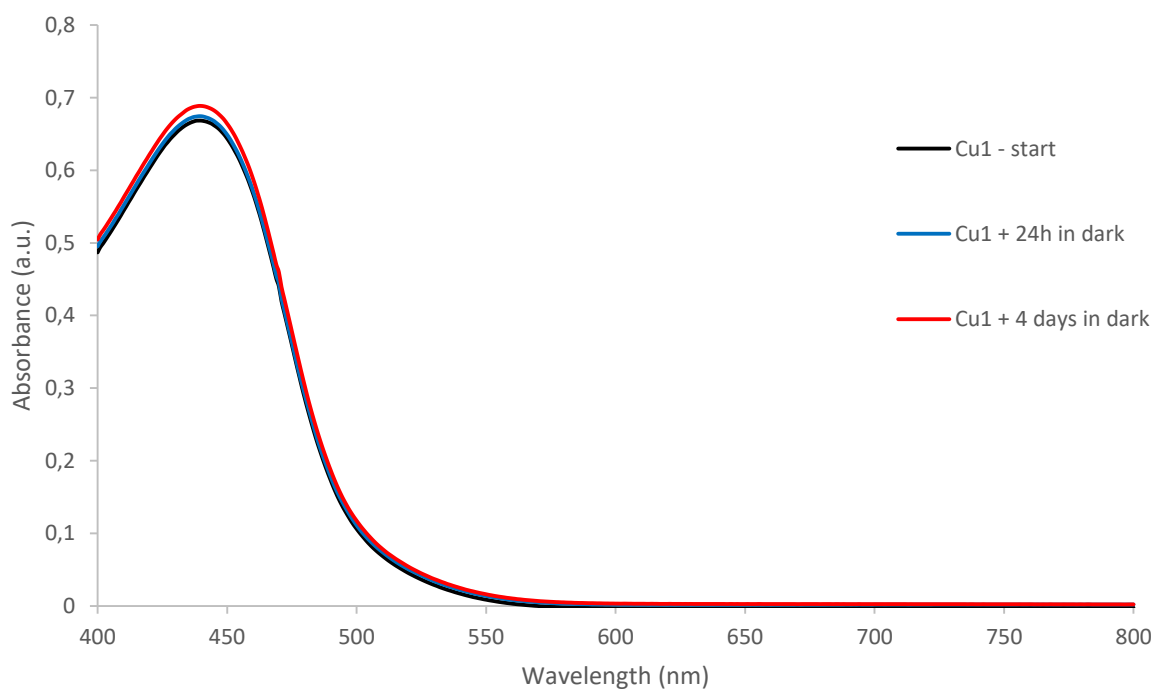

**Figure S10.** Evolution of the UV-Vis spectra of  $[\text{Cu}(\text{dipp})_2]^+$  (up) and **Cu1** (bottom) in dichloromethane when shelved in ambient conditions (dotted lines) or when stored in dark (plain lines).

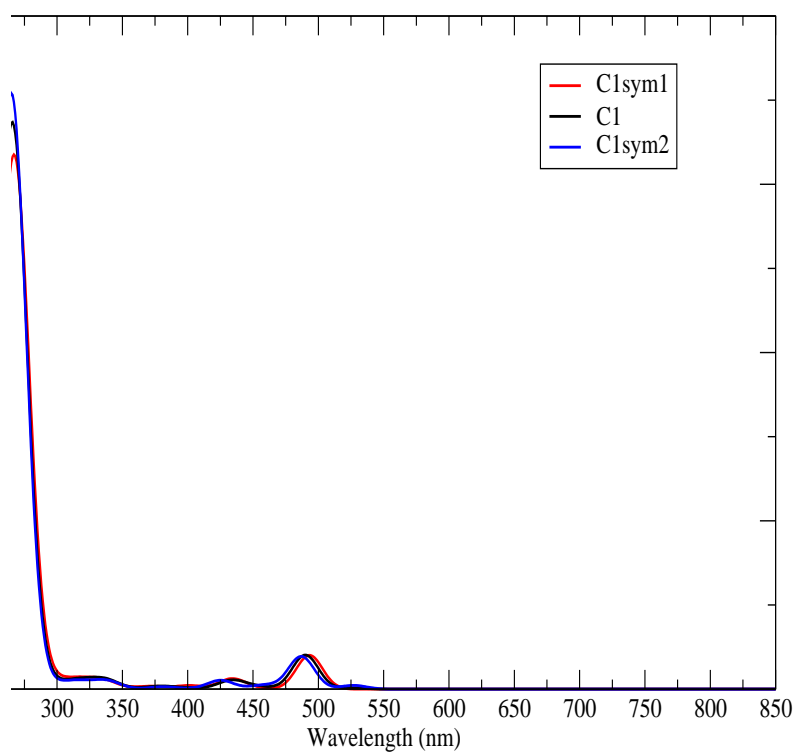

**Figure S11.** Overlaid absorption spectra of the three rotamers of **Cu1**.



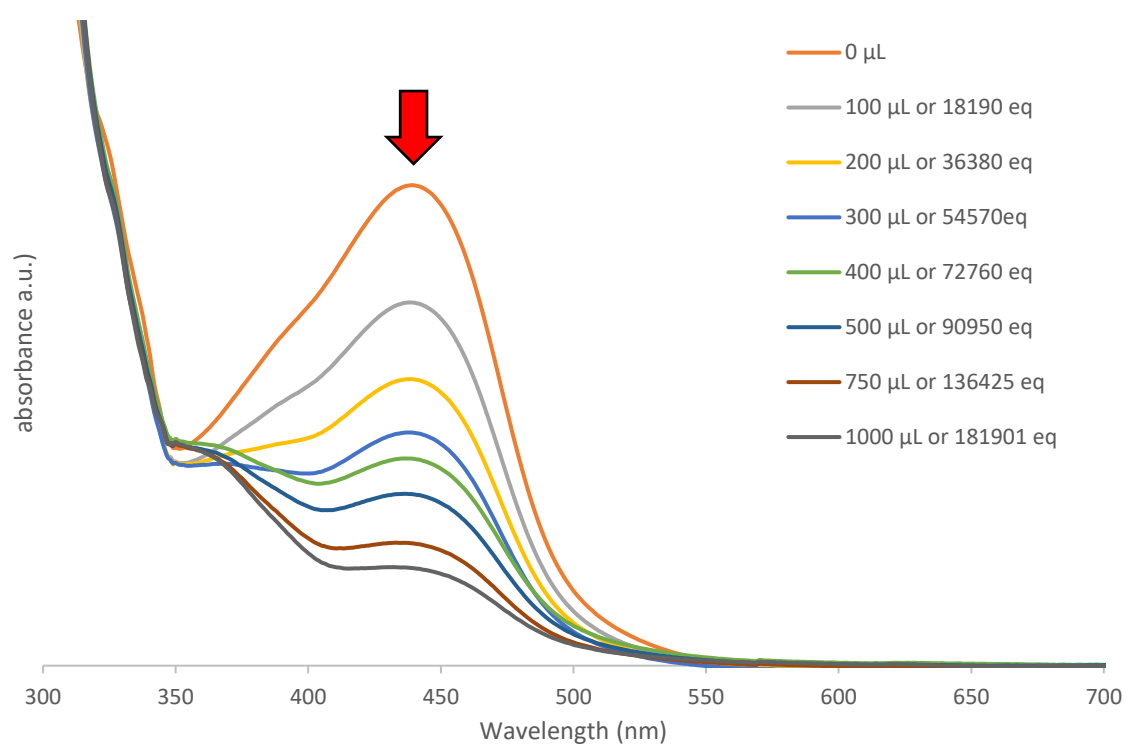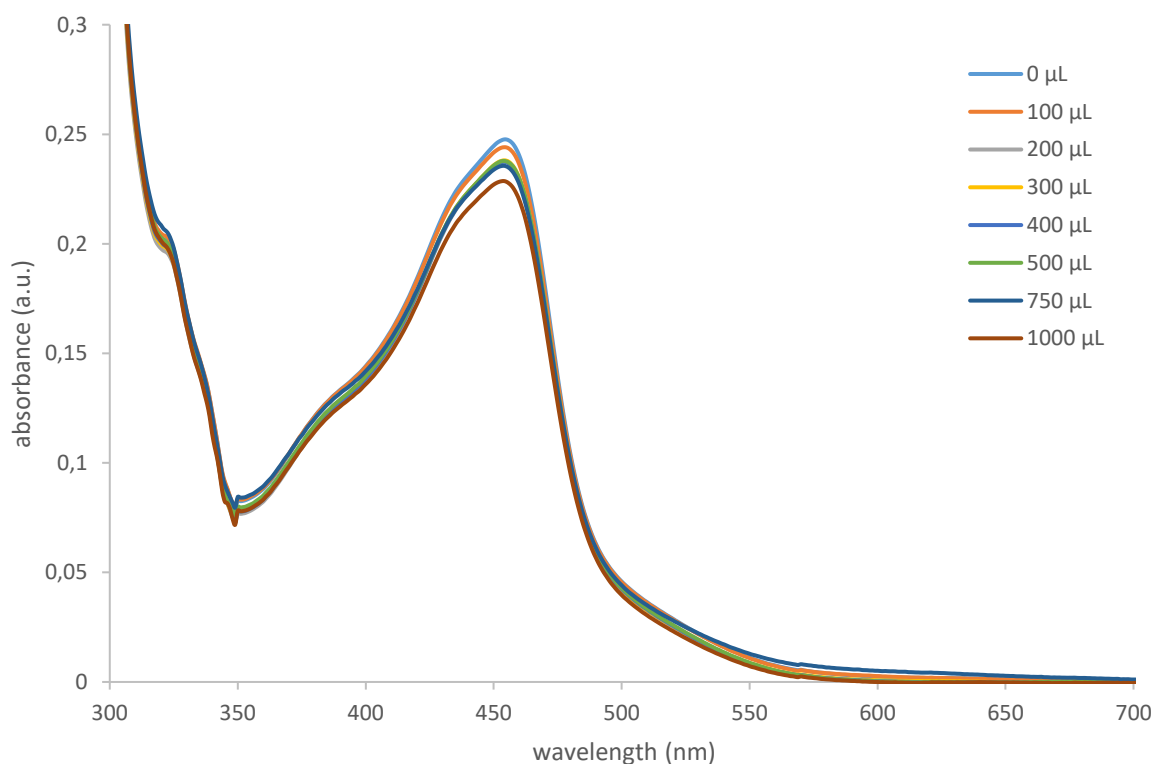

**Figure S12.** Evolution of the absorption spectra of **Cu1** (up) and [Cu(dipp)<sub>2</sub>]<sup>+</sup> (bottom) in dichloromethane upon addition of controlled aliquots of acetonitrile (normalized vs. dilution).

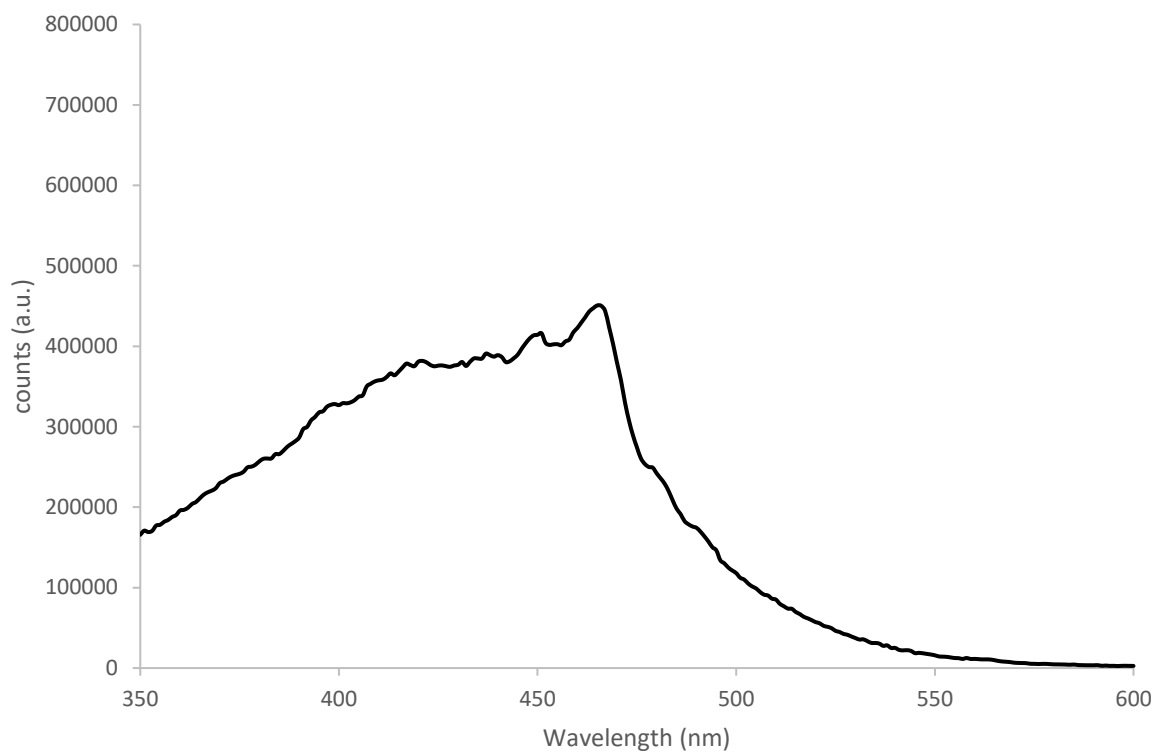

**Figure S13.** Excitation spectrum of **Cu1** in dichloromethane ( $\lambda_{em} = 678$  nm).

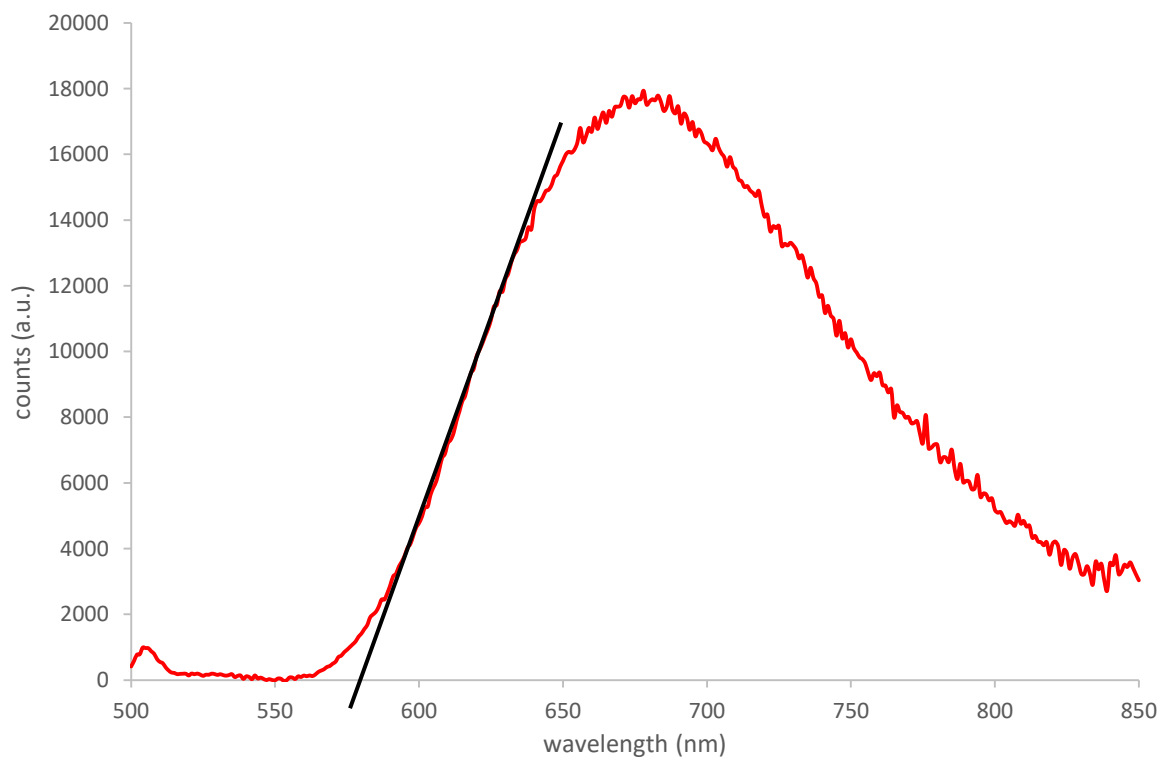

**Figure S14.** Determination of  $E^0$  for **Cu1** by the tangent method.

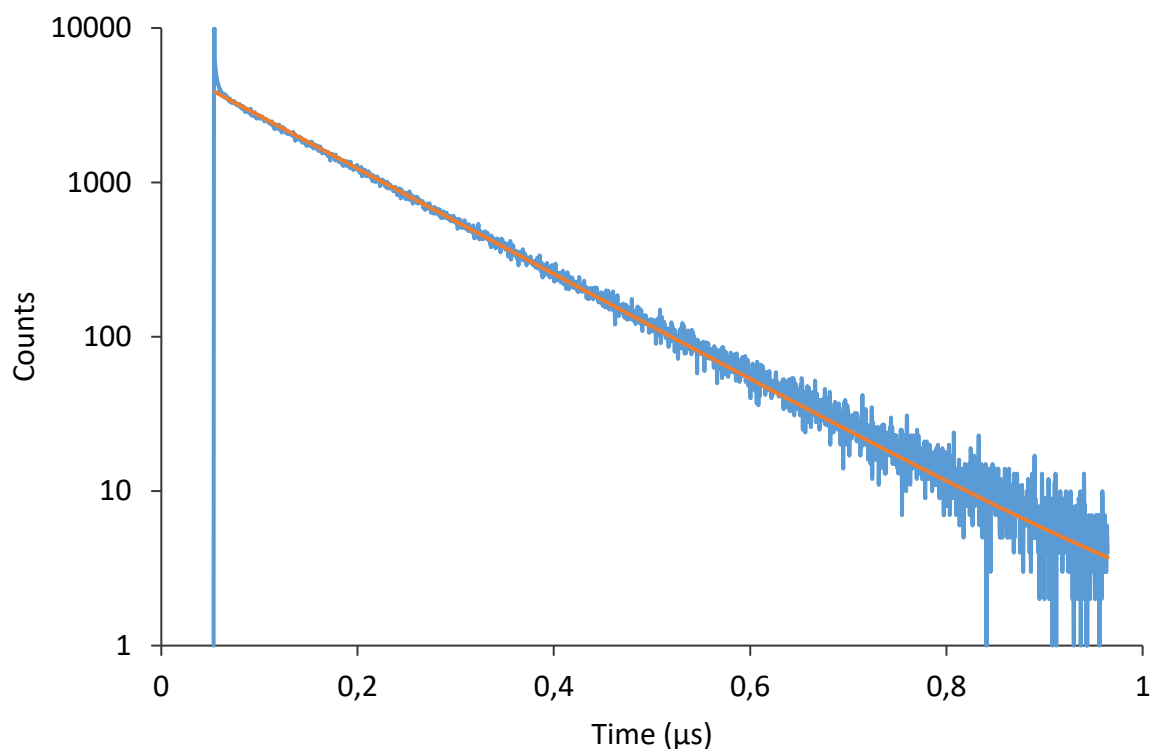

**Figure S15.** Decay of the emission intensity vs. time recorded by time correlated single photon counting for complex **Cu1** in degassed dichloromethane solution. Blue line: experimental data. Orange solid line: fitting of the long-lived decay.

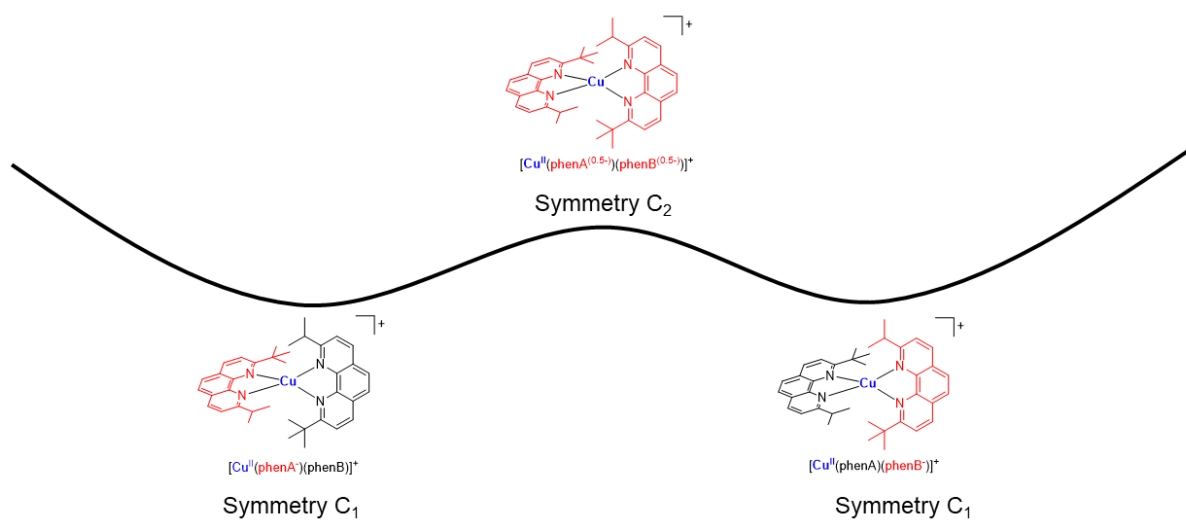

**Figure S16.** Illustration of the symmetry of the excited state whether the electron is localized on one ligand or on both. In red is symbolized the electron density localization, in blue the electron density depletion. The illustration is the same for **Cu1<sub>sym1</sub>** and **Cu1<sub>sym2</sub>**. For **Cu1<sub>nosym</sub>**, one must bear in mind that when the electron is delocalized over the two ligands, the symmetry remains C<sub>1</sub> because of the symmetry constraints imposed by the different orientations of the *tert*-butyl groups.

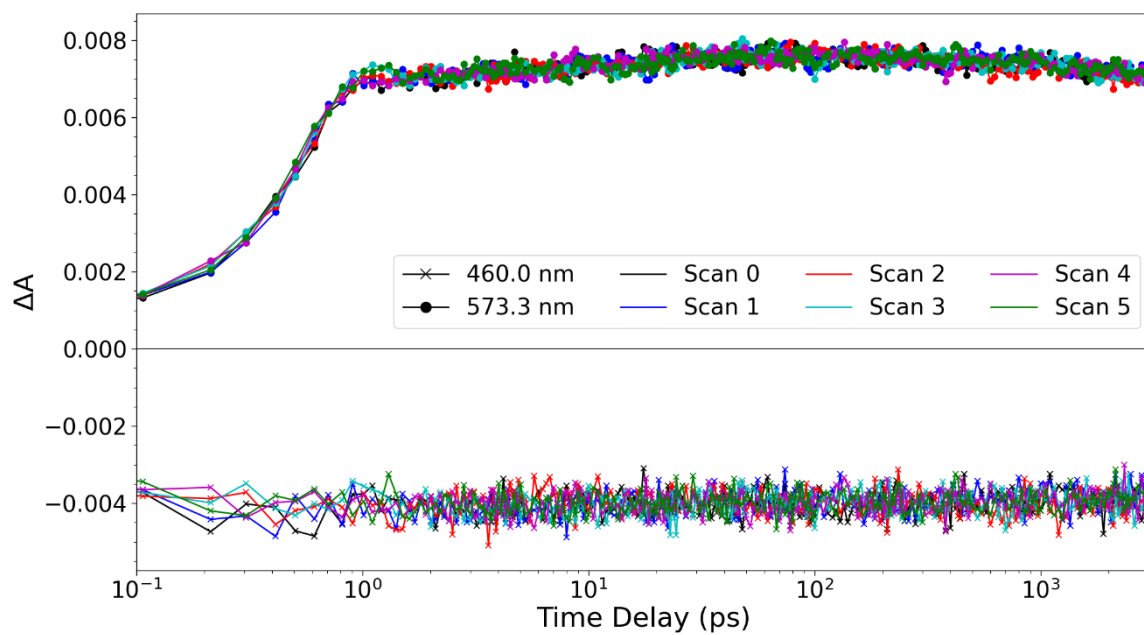

**Figure S17.** Overlay of the transient signals at the peak of the ground-state bleach (460.0 nm) and excited-state absorption (573.3 nm) from sequential scans of the optical delay stage showing no change in signal over the course of the 30 min transient absorption measurement. The pump pulse was centered at 415 nm with 500 nJ/pulse (0.25 mW at 0.5 kHz) and was focused to about 300  $\mu\text{m}$  at the sample.

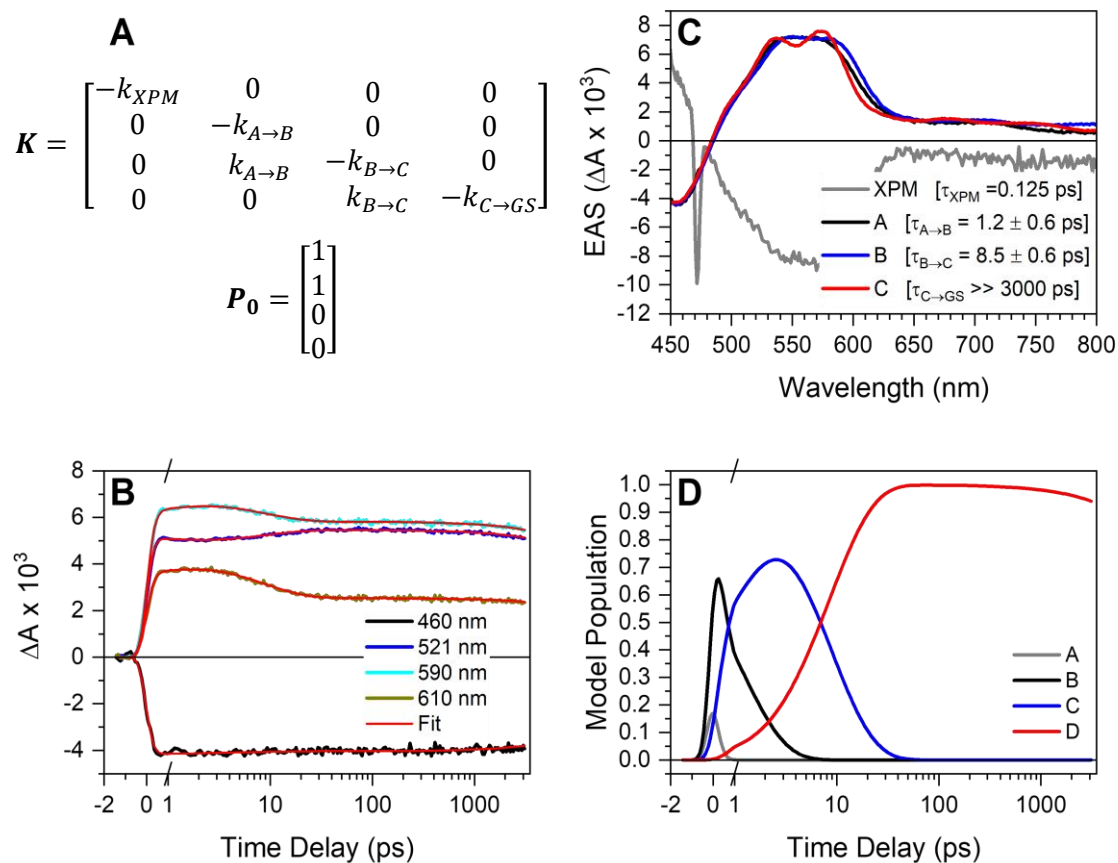

**Figure S18.** (A) Rate matrix  $K$  and initial population matrix  $P_0$  used in first-order sequential kinetic model. XPM stands for cross-phase modulation and captures the coherent signals that occur when the pump and probe laser pulses are overlapped in time. (B) Kinetic traces at select probe wavelengths overlaid with the kinetic fit. (C) Evolution-associated spectra for each state in the kinetic model and (D) the model population traces for each state in the kinetic model.

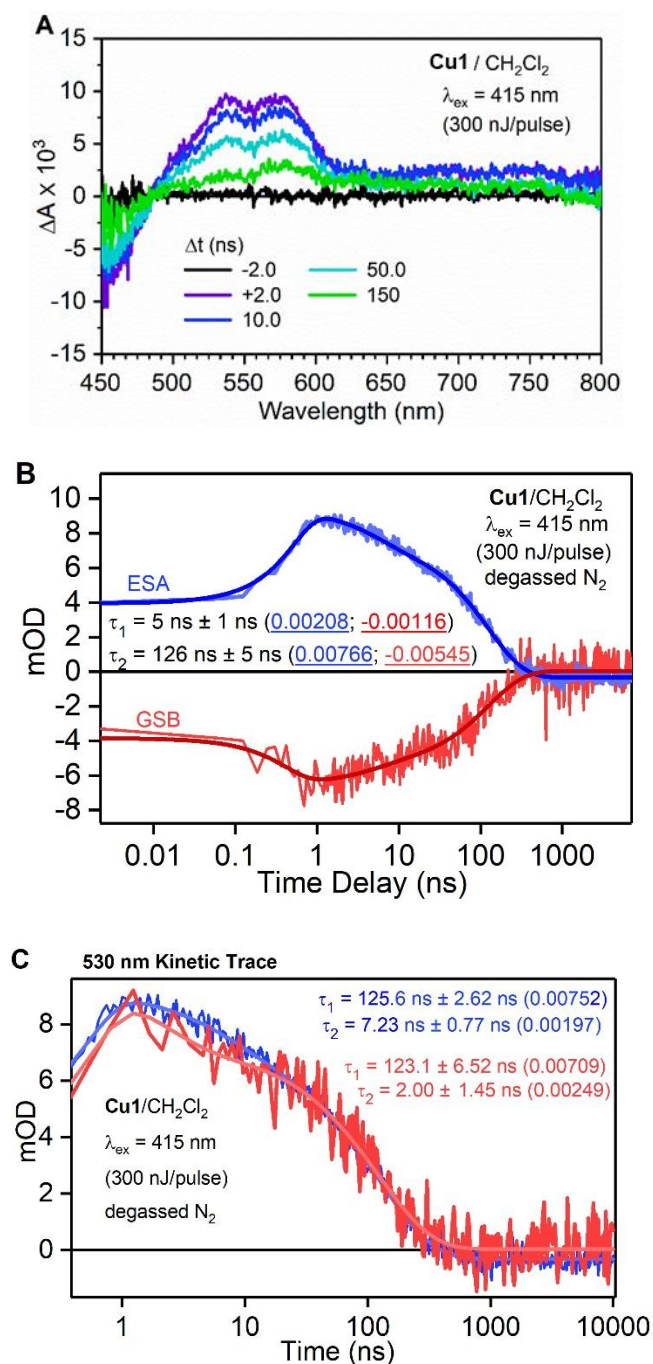

**Figure S19.** (A) Optical transient absorption spectra at nanosecond through microsecond time delays following excitation by 415 nm laser pulses for a solution of **Cu1** in dichloromethane. (B) Global fit of kinetic traces at probe wavelengths corresponding to the ESA and GSB with shared decay lifetimes  $\tau_1$  and  $\tau_2$ . The corresponding amplitudes for the ESA and GSB are shown in blue and red, respectively. (C) Overlaid kinetic traces from two separate experimental trials of **Cu1** in dichloromethane showing the biexponential dynamics. The two kinetic traces were fit independently and show similar values and relative amplitudes for  $\tau_1$  and  $\tau_2$ .

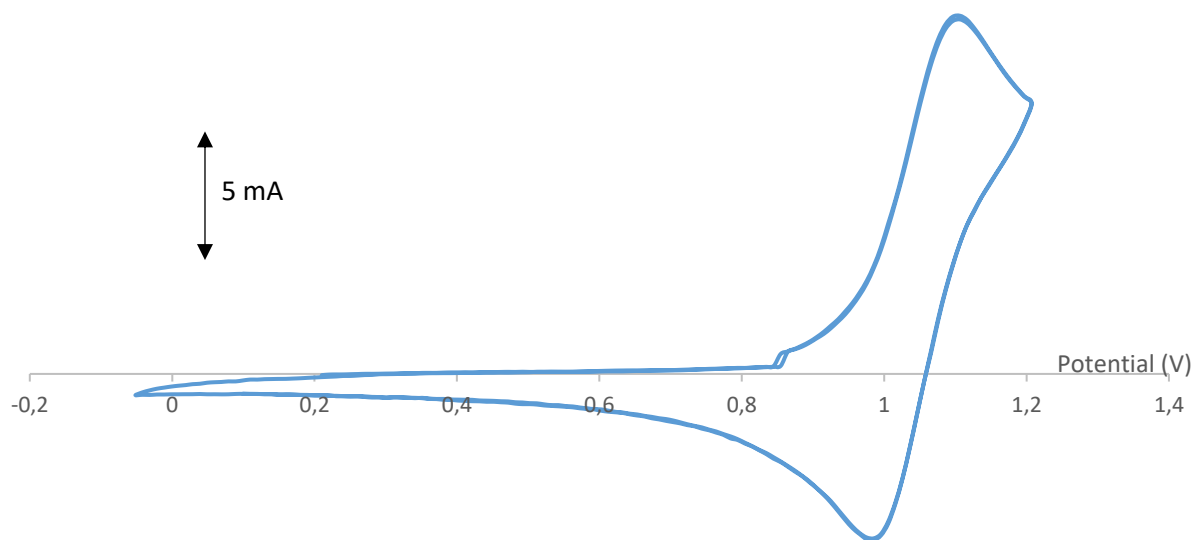

**Figure S20.** Cyclic voltammograms for complexes **Cu1** ( $\text{Cu}^{\text{II}}/\text{Cu}^{\text{I}}$  couple) in argon purged dichloromethane. The working electrode is a platinum disk (2 mm diameter), the counter-electrode is a platinum sheet (ca 0.25 cm<sup>2</sup>) and the reference electrode is the saturated calomel electrode (SCE). There is no signal below -0.1 V vs. SCE within the solvent activity window. All potentials in the main text are referred to the ferrocinium/ferrocene couple which was added at the end of each experiment.

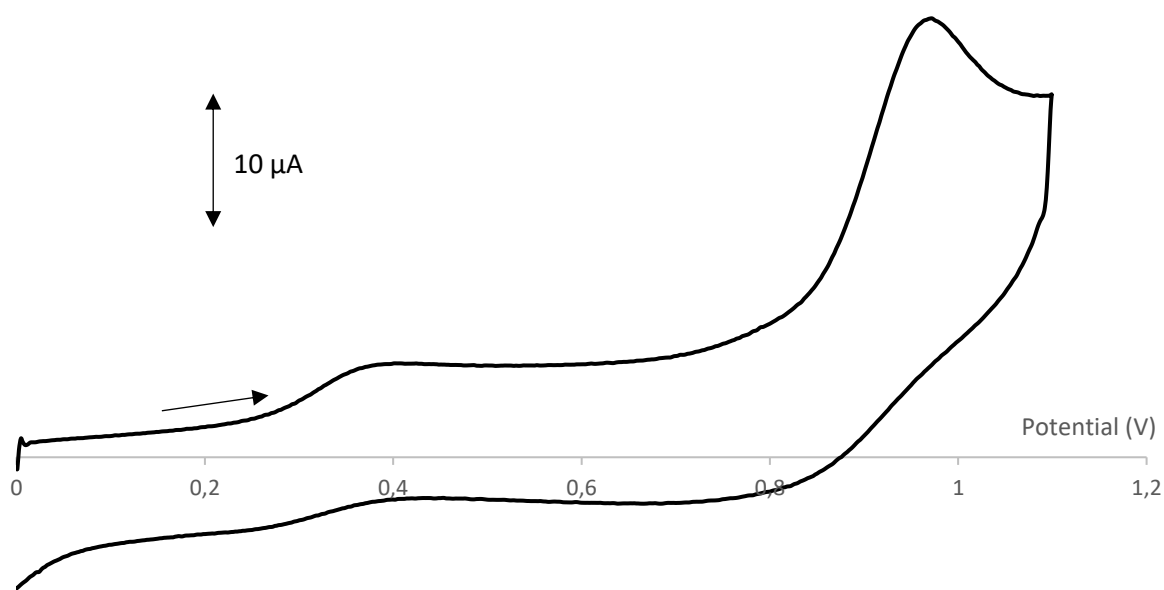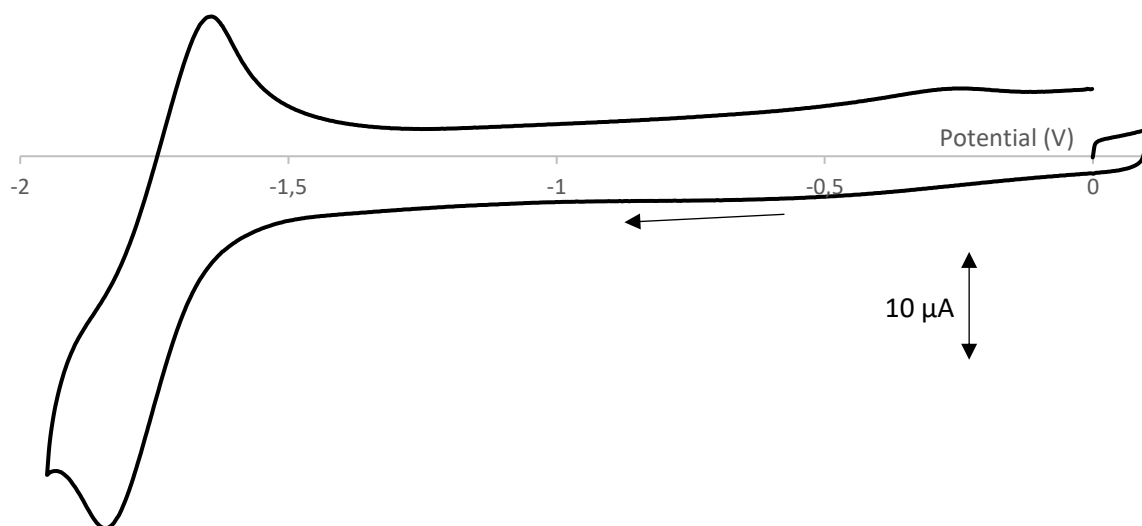

**Figure S21.** Cyclic voltammograms for complexes **Cu1** (addition of an extra electron on a coordinated ligand) in argon purged dimethylformamide. The working electrode is a platinum disk (2mm diameter), the counter-electrode is a platinum sheet (0.25 cm<sup>2</sup>) and the reference electrode is a silver/silver nitrate reference. All potentials in the main text are referred to the ferrocinium/ferrocene couple which was added at the end of each experiment.



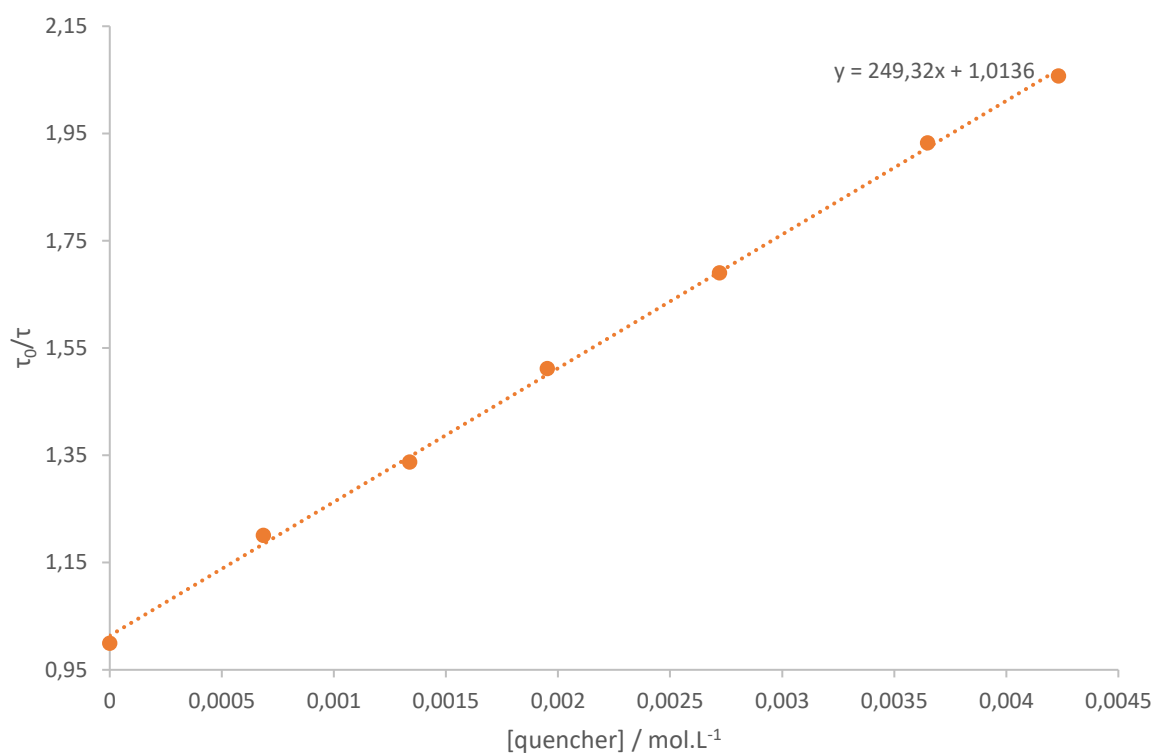

**Figure S22.** Stern-Volmer plots: monitoring the quenching of the luminescence of complex **Cu1** in presence of decamethylferrocene (dmFc, orange line).

**Table ST1.** Bond lengths (in Å) and angles (in degrees) of interest for the three rotamers of **Cu1** computed with ADF (ground state) in  $C_1$  point group.

|                           | <b>Cu1sym1</b> | <b>Cu1nosym</b> | <b>Cu1sym2</b> |
|---------------------------|----------------|-----------------|----------------|
| Cu-N1B                    | 2.052          | 2.051           | 2.015          |
| Cu-N1A                    | 2.052          | 2.026           | 2.015          |
| Cu-N2B                    | 2.122          | 2.132           | 2.199          |
| Cu-N2A                    | 2.122          | 2.179           | 2.199          |
| N1B-Cu-N2B                | 83.14          | 82.51           | 82.05          |
| N1B-Cu-N1A                | 110.38         | 114.88          | 123.46         |
| N1B-Cu-N2A                | 121.84         | 119.35          | 120.3          |
| N2B-Cu-N1A                | 121.84         | 121.99          | 120.3          |
| N2B-Cu-N2A                | 138.11         | 138.8           | 134.51         |
| N1A-Cu-N2A                | 83.14          | 82.36           | 82.05          |
| X-Cu-X                    | 163.0          | 160.4           | 162.7          |
| $C\alpha$ -X-X- $C\alpha$ | 83.7           | 89.9            | 97.3           |
| $\tau_4$                  | 0.71           | 0.70            | 0.72           |

**Table ST2.** Energy (in Ev), wavelength (nm), oscillator strength and nature of the singlet states of the absorption spectrum of **Cu1**.

| State | Energy | Wavelength | Oscillator | MC    | LC     | MLCT   | LMCT  | LLCT   |
|-------|--------|------------|------------|-------|--------|--------|-------|--------|
| 1     | 2.359  | 525        | 8.00E-03   | 2.29% | 18.81% | 71.27% | 0.81% | 6.82%  |
| 2     | 2.420  | 512        | 1.00E-03   | 2.20% | 19.00% | 71.25% | 0.79% | 6.75%  |
| 3     | 2.530  | 490        | 2.03E-01   | 2.20% | 8.19%  | 72.61% | 0.70% | 16.30% |
| 4     | 2.707  | 458        | 7.00E-03   | 0.48% | 17.50% | 72.27% | 0.17% | 9.58%  |
| 5     | 2.728  | 454        | 4.00E-03   | 0.12% | 18.75% | 72.58% | 0.04% | 8.52%  |
| 6     | 2.816  | 440        | 2.10E-02   | 1.11% | 6.63%  | 74.93% | 0.34% | 17.00% |
| 7     | 2.862  | 433        | 1.30E-02   | 1.28% | 8.49%  | 74.54% | 0.38% | 15.31% |
| 8     | 2.880  | 430        | 2.60E-02   | 0.10% | 9.05%  | 74.06% | 0.04% | 16.76% |
| 9     | 3.084  | 402        | 6.00E-03   | 2.70% | 5.35%  | 86.20% | 0.33% | 5.42%  |
| 10    | 3.146  | 394        | 2.00E-03   | 2.59% | 5.22%  | 85.49% | 0.33% | 6.37%  |
| 11    | 3.237  | 383        | 2.00E-03   | 3.35% | 3.87%  | 89.09% | 0.25% | 3.45%  |
| 12    | 3.258  | 381        | 1.20E-02   | 3.39% | 4.45%  | 88.06% | 0.28% | 3.83%  |
| 13    | 3.333  | 372        | 3.00E-03   | 3.20% | 2.98%  | 90.57% | 0.20% | 3.05%  |
| 14    | 3.354  | 370        | 3.00E-03   | 2.56% | 6.53%  | 85.17% | 0.28% | 5.47%  |
| 15    | 3.462  | 358        | 1.00E-03   | 0.49% | 6.00%  | 87.57% | 0.07% | 5.87%  |
| 16    | 3.498  | 354        | 1.00E-03   | 0.06% | 6.14%  | 87.92% | 0.01% | 5.87%  |
| 17    | 3.658  | 339        | 3.50E-02   | 0.08% | 8.87%  | 85.90% | 0.07% | 5.09%  |
| 18    | 3.692  | 336        | 1.00E-02   | 0.52% | 6.07%  | 87.33% | 0.09% | 5.99%  |
| 19    | 3.702  | 335        | 1.00E-03   | 0.55% | 5.53%  | 87.88% | 0.09% | 5.96%  |
| 20    | 3.725  | 333        | 3.00E-03   | 0.43% | 7.72%  | 86.28% | 0.14% | 5.42%  |
| 21    | 3.755  | 330        | 1.00E-02   | 1.03% | 13.42% | 77.53% | 0.32% | 7.69%  |
| 22    | 3.800  | 326        | 2.00E-03   | 1.06% | 17.90% | 73.81% | 0.36% | 6.88%  |
| 23    | 3.896  | 318        | 4.10E-02   | 1.12% | 12.65% | 70.28% | 0.36% | 15.60% |
| 24    | 3.992  | 311        | 4.00E-03   | 0.67% | 71.15% | 19.75% | 1.68% | 6.75%  |
| 25    | 4.038  | 307        | 1.40E-02   | 0.11% | 80.25% | 10.00% | 1.97% | 7.67%  |
| 26    | 4.150  | 299        | 2.00E-03   | 0.91% | 25.29% | 48.33% | 1.29% | 24.18% |
| 27    | 4.173  | 297        | 1.00E-03   | 0.25% | 5.36%  | 11.74% | 2.49% | 80.17% |
| 28    | 4.177  | 297        | 1.00E-03   | 0.10% | 7.06%  | 2.81%  | 2.67% | 87.36% |
| 29    | 4.244  | 292        | 2.70E-02   | 0.05% | 90.08% | 3.94%  | 1.23% | 4.71%  |
| 30    | 4.261  | 291        | 9.00E-03   | 0.07% | 89.63% | 5.18%  | 1.28% | 3.84%  |
| 31    | 4.385  | 283        | 2.00E-03   | 0.80% | 18.17% | 68.74% | 0.35% | 11.95% |
| 32    | 4.414  | 281        | 2.00E-03   | 0.01% | 3.04%  | 3.27%  | 0.39% | 93.29% |
| 33    | 4.420  | 281        | 5.00E-03   | 0.01% | 2.94%  | 3.36%  | 0.28% | 93.42% |
| 34    | 4.437  | 279        | 1.00E-03   | 0.22% | 18.66% | 71.83% | 0.10% | 9.20%  |
| 35    | 4.461  | 278        | 1.90E-02   | 0.05% | 3.29%  | 1.83%  | 2.72% | 92.12% |
| 36    | 4.501  | 275        | 7.00E-03   | 0.82% | 11.95% | 68.37% | 0.48% | 18.38% |
| 37    | 4.512  | 275        | 1.50E-02   | 1.28% | 7.48%  | 81.58% | 0.24% | 9.43%  |
| 38    | 4.523  | 274        | 5.20E-02   | 0.17% | 5.59%  | 7.03%  | 2.53% | 84.70% |
| 39    | 4.552  | 272        | 1.50E-02   | 1.22% | 7.79%  | 82.88% | 0.24% | 7.88%  |
| 40    | 4.558  | 272        | 3.70E-02   | 0.15% | 16.93% | 69.19% | 0.21% | 13.52% |
| 41    | 4.574  | 271        | 7.22E-01   | 0.49% | 60.06% | 33.79% | 1.53% | 4.13%  |
| 42    | 4.587  | 270        | 7.07E-01   | 0.46% | 55.32% | 33.57% | 1.65% | 9.01%  |
| 43    | 4.661  | 266        | 2.77E-01   | 0.28% | 77.96% | 14.73% | 1.52% | 5.51%  |
| 44    | 4.684  | 265        | 1.01E-01   | 0.29% | 81.31% | 14.21% | 1.51% | 2.69%  |
| 45    | 4.703  | 264        | 6.20E-02   | 0.23% | 3.93%  | 11.17% | 0.41% | 84.26% |
| 46    | 4.727  | 262        | 2.00E-01   | 1.57% | 23.32% | 64.59% | 0.40% | 10.13% |
| 47    | 4.737  | 262        | 8.14E-01   | 1.21% | 32.99% | 55.28% | 0.71% | 9.81%  |
| 48    | 4.756  | 261        | 5.64E-01   | 1.28% | 22.81% | 71.59% | 0.47% | 3.85%  |
| 49    | 4.770  | 260        | 1.40E-02   | 0.11% | 3.67%  | 7.17%  | 0.19% | 88.87% |
| 50    | 4.777  | 260        | 1.34E-01   | 0.96% | 23.88% | 65.68% | 0.47% | 9.02%  |

|    |       |     |          |        |        |        |       |        |
|----|-------|-----|----------|--------|--------|--------|-------|--------|
| 51 | 4.910 | 253 | 7.00E-03 | 8.69%  | 12.34% | 64.49% | 2.99% | 11.50% |
| 52 | 5.015 | 247 | 5.00E-03 | 8.89%  | 11.87% | 65.14% | 2.95% | 11.15% |
| 53 | 5.123 | 242 | 1.00E-03 | 1.01%  | 6.54%  | 86.60% | 0.14% | 5.72%  |
| 54 | 5.194 | 239 | 0.00E+00 | 0.07%  | 7.09%  | 87.05% | 0.04% | 5.75%  |
| 55 | 5.252 | 236 | 1.00E-03 | 0.20%  | 13.67% | 72.53% | 0.07% | 13.52% |
| 56 | 5.340 | 232 | 1.00E-03 | 1.16%  | 13.92% | 71.75% | 0.32% | 12.85% |
| 57 | 5.360 | 231 | 0.00E+00 | 0.25%  | 12.93% | 73.88% | 0.07% | 12.87% |
| 58 | 5.364 | 231 | 5.00E-03 | 0.86%  | 7.00%  | 84.34% | 0.15% | 7.66%  |
| 59 | 5.372 | 231 | 1.70E-02 | 0.20%  | 6.80%  | 86.60% | 0.05% | 6.35%  |
| 60 | 5.392 | 230 | 6.00E-03 | 0.36%  | 14.44% | 72.33% | 0.12% | 12.75% |
| 61 | 5.398 | 230 | 5.00E-03 | 1.20%  | 21.41% | 68.95% | 0.53% | 7.92%  |
| 62 | 5.408 | 229 | 8.00E-03 | 0.41%  | 30.60% | 63.33% | 0.82% | 4.85%  |
| 63 | 5.419 | 229 | 1.60E-02 | 0.40%  | 39.11% | 54.06% | 1.06% | 5.36%  |
| 64 | 5.435 | 228 | 8.30E-02 | 1.22%  | 23.48% | 60.47% | 0.58% | 14.25% |
| 65 | 5.443 | 228 | 3.82E-01 | 0.10%  | 38.21% | 7.45%  | 1.56% | 52.68% |
| 66 | 5.463 | 227 | 1.56E-01 | 0.35%  | 63.88% | 15.21% | 1.90% | 18.66% |
| 67 | 5.467 | 227 | 4.56E-01 | 0.24%  | 60.08% | 8.01%  | 1.68% | 29.98% |
| 68 | 5.494 | 226 | 8.30E-02 | 0.14%  | 33.84% | 5.95%  | 1.56% | 58.51% |
| 69 | 5.494 | 226 | 9.00E-03 | 0.34%  | 15.31% | 71.53% | 0.16% | 12.68% |
| 70 | 5.516 | 225 | 6.70E-02 | 0.19%  | 55.99% | 7.27%  | 1.26% | 35.29% |
| 71 | 5.583 | 222 | 5.10E-02 | 0.46%  | 73.41% | 9.74%  | 2.05% | 14.34% |
| 72 | 5.622 | 221 | 2.33E-01 | 0.37%  | 84.95% | 6.02%  | 1.59% | 7.07%  |
| 73 | 5.665 | 219 | 1.00E-02 | 10.30% | 7.49%  | 75.78% | 1.29% | 5.13%  |
| 74 | 5.683 | 218 | 8.50E-02 | 0.55%  | 74.59% | 14.00% | 1.78% | 9.09%  |
| 75 | 5.702 | 217 | 1.18E-01 | 0.34%  | 75.80% | 14.02% | 1.42% | 8.42%  |
| 76 | 5.713 | 217 | 1.00E-03 | 1.01%  | 17.42% | 68.22% | 0.34% | 13.02% |
| 77 | 5.749 | 216 | 3.00E-03 | 0.48%  | 42.66% | 42.99% | 0.56% | 13.32% |
| 78 | 5.756 | 215 | 2.70E-02 | 0.50%  | 41.28% | 38.44% | 0.89% | 18.89% |
| 79 | 5.768 | 215 | 6.00E-03 | 0.12%  | 58.24% | 15.30% | 1.11% | 25.22% |
| 80 | 5.788 | 214 | 1.10E-02 | 0.17%  | 7.40%  | 5.78%  | 1.68% | 84.97% |

**Comment about the so called “ $\pi$ - $\pi$ ” transition at 250 nm:** this band corresponds to the overlay of several transitions: a first set, centered at 270 nm, is due to no less than four primarily LC-centered transitions ( $S_0 \rightarrow S_{41}$  (271 nm),  $S_0 \rightarrow S_{42}$  (270 nm),  $S_0 \rightarrow S_{43}$  (266 nm) and  $S_0 \rightarrow S_{44}$  (265 nm)), which account for the experimental shoulder around 290 nm. The second set, centered at 260 nm, is composed of  $S_0 \rightarrow S_{46}$  (262 nm),  $S_0 \rightarrow S_{47}$  (262 nm),  $S_0 \rightarrow S_{48}$  (261 nm) and  $S_0 \rightarrow S_{50}$  (260 nm), which are primarily MLCT states. We thus underline here the complexity of the observed transitions in the UV part of the spectra.

**Table ST3.** Emission ( $E_{em}$ ), distortion ( $E_{dist}$ ) and stabilization ( $E_{stab}$ ) energies in eV, emission wavelength in nm ( $\lambda_{em}$ ) and oscillator strength ( $f_{osc}$ ) of the lowest  $S_1$  and  $T_1$  states for  $[Cu(dipp)_2]^+$ .

| Structure       | $[Cu(dipp)_2]^+$ |       |
|-----------------|------------------|-------|
|                 | S1A              | T1A   |
| $E_{em}$        | 1.631            | 1.356 |
| $\lambda_{em}$  | 760              | 914   |
| $E_{dist}$      | 0.441            | 0.442 |
| $E_{stab}$      | 2.072            | 1.798 |
| $\Delta E_{ST}$ |                  | 0.336 |
| SOC             |                  | 56.8  |

**Table ST4.** Bond lengths and angles of interest for the oxidized complex  $[Cu(L1)_2]^{2+}$  (**Cu1**),  $[Cu(dipp)_2]^{2+}$  and  $[Cu(dtbp)_2]^{2+}$  computed with GAUSSIAN. Illustration of the phen-Cu-phen angle, defined by the angle between segments  $(C\alpha-X)_{phenA}$  and  $(C\alpha-X)_{phenB}$  ( $X$  = center of the phenyl ring).

| Parameter             | $[Cu(dipp)_2]^{charge}$ |        | $[Cu(L1)_2]^{charge}$ |        | $[Cu(dtbp)_2]^{charge}$ |        |
|-----------------------|-------------------------|--------|-----------------------|--------|-------------------------|--------|
|                       | +                       | 2+     | +                     | 2+     | +                       | 2+     |
| Charge                | +                       | 2+     | +                     | 2+     | +                       | 2+     |
| Cu-N1A                | 2.070                   | 2.017  | 2.052                 | 2.102  | 2.132                   | 2.012  |
| Cu-N2A                | 2.070                   | 2.017  | 2.135                 | 1.994  | 2.154                   | 2.166  |
| Cu-N1B                | 2.070                   | 2.018  | 2.035                 | 2.083  | 2.133                   | 2.012  |
| Cu-N2B                | 2.070                   | 2.018  | 2.164                 | 1.993  | 2.153                   | 2.166  |
| N1B-Cu-N2B            | 82.38                   | 83.98  | 83.50                 | 84.61  | 83.63                   | 84.76  |
| N1B-Cu-N1A            | 124.50                  | 111.78 | 110.42                | 102.38 | 123.24                  | 116.69 |
| N1B-Cu-N2A            | 124.50                  | 137.14 | 121.79                | 111.69 | 122.84                  | 116.43 |
| N2B-Cu-N1A            | 124.50                  | 137.14 | 121.79                | 112.69 | 125.56                  | 140.28 |
| N2B-Cu-N2A            | 124.50                  | 111.78 | 137.49                | 154.21 | 123.32                  | 116.69 |
| N1A-Cu-N2A            | 82.38                   | 84.06  | 83.50                 | 84.15  | 83.62                   | 84.77  |
| X-Cu-X                | 180.0                   | 180.0  | 160.4                 | 148.6  | 172.0                   | 163.8  |
| $C\alpha-X-X-C\alpha$ | 90.0                    | 70.3   | 89.9                  | 86.0   | 88.9                    | 82.0   |
| $\tau_4$              | 0.79                    | 0.61   | 0.71                  | 0.66   | 0.79                    | 0.73   |

## References

- (1) Dobson, J. F.; Green, B. E.; Healy, P. C.; Kennard, C. H. L.; Pakawatchai, C.; White, A. H. The stereochemistry of Bis(2,9-dimethyl-1,10-phenanthroline)copper(I) complexes: the crystal and molecular structures of Bis(2,9-dimethyl-1,10-phenanthroline)copper(I) bromide hydrate, Bis(4,4',6,6'-tetramethyl-2,2'-bipyridine)copper(I) chloride dihydrate, and Bis(2,9-dimethyl-1,10-phenanthroline)copper(I) nitrate dihydrate (a redetermination). *Australian Journal of Chemistry* **1984**, *37*, 649-659,
- (2) Smith, C. S.; Mann, K. R. Void Space Containing Crystalline Cu(I) Phenanthroline Complexes As Molecular Oxygen Sensors. *Chem. Mater.* **2009**, *21*, 5042-5049, 10.1021/cm901109n.
- (3) Gandhi, B. A.; Green, O.; Burstyn, J. N. Facile Oxidation-Based Synthesis of Sterically Encumbered Four-Coordinate Bis(2,9-di-tert-butyl-1,10-phenanthroline)copper(I) and Related Three-Coordinate Copper(I) Complexes. *Inorg. Chem.* **2007**, *46*, 3816-3825, 10.1021/ic0615224.
